# Supplementary material for: Exploring Dynamic Metabolome of the HepG2 Cell Line: Rise and Fall
Source: MDPI journal article supplement (doi:10.3390/cells11223548), 2022-11-10
Supplement: s1 [file s1]

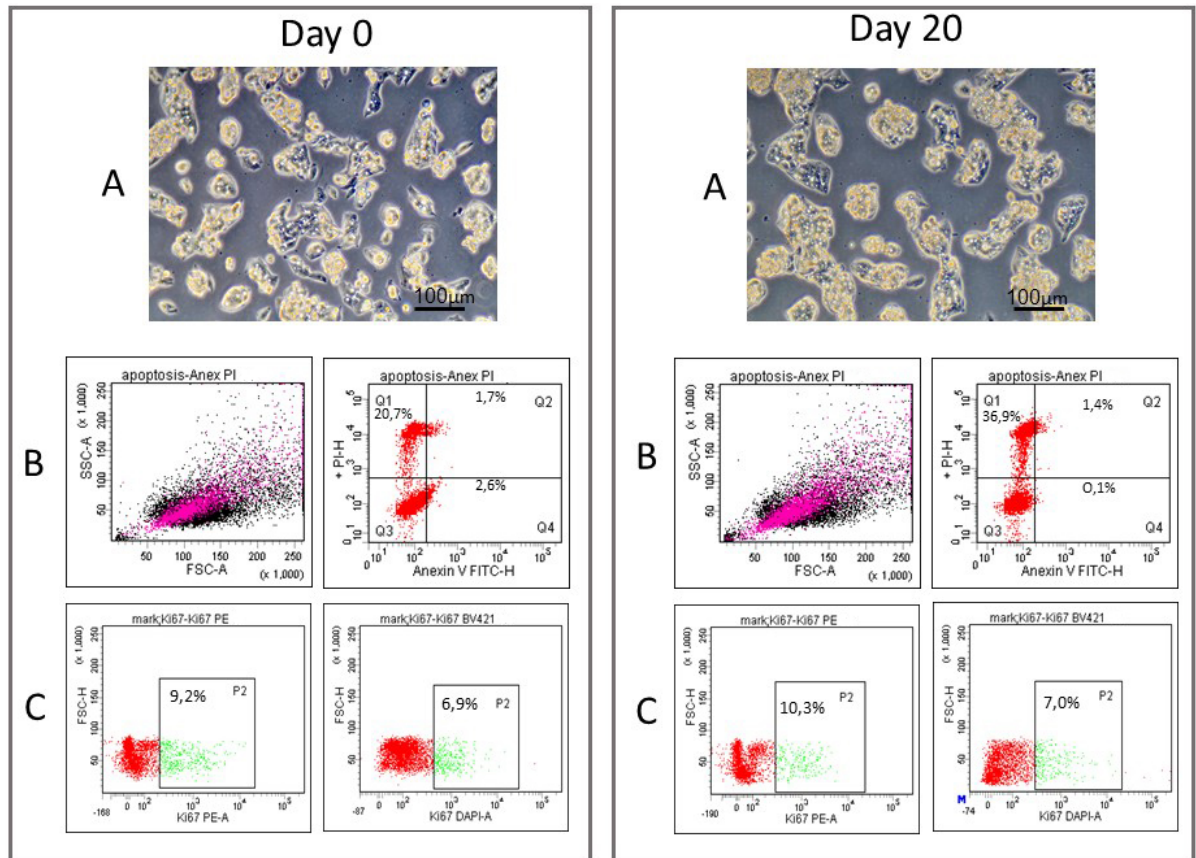

Figure S1. The state of HepG2 culture at the initial and final stages of its growth: (a) cell morphology and phase contrast microscopy; (b) cell viability analysis. The cells were stained with Annexin V-FITC and propidium iodide (PI) and analyzed with flow cytometry. Early (Q4) and late (Q2) apoptotic cells are almost absent at both stages of the cultivation, as can be seen from Annexin V staining. There are also no high side and low forward scatter signals common to apoptotic cells (left dot plots). The relatively high number of dead cells (Q1) detected by PI staining may result from the preparation of the cell suspension for flow cytometric analysis, as the HepG2 cells tend to form aggregates requiring dissociation. Purple color indicates the position of dead cells in forward and side light scattering coordinates; and (c) the percentage of proliferating cells. Cells were stained with one of two types of antibodies (PE or BV421 conjugated) against the marker of proliferating cells, Ki67;.

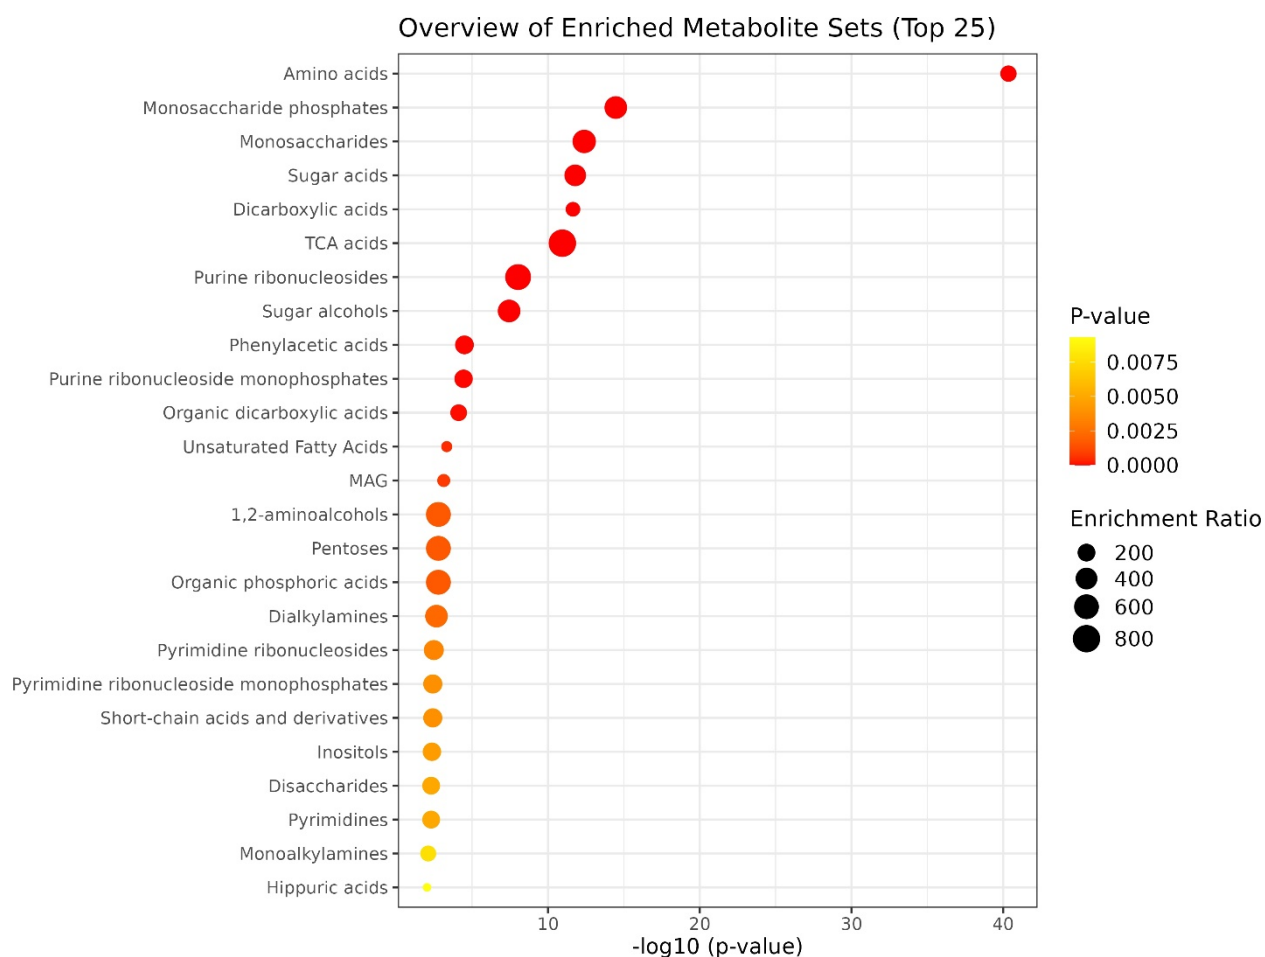

Figure S2: Dot plot of enriched chemical sub-classes of metabolites detected in HepG2, according to HMDB classification. Each circle denotes a sub-class, and the fill color represents the significance of enrichment of that subclass from pale yellow (low significance) to red (high significance). The enrichment p-value was calculated by comparing the observed frequency of metabolic hit with the frequency expected by chance. The smaller the p-value, the more enriched the resulting data set. The enrichment ratio is the ratio between observed and expected hits.

**Supplementary Table S1.** Chromatographic characteristics of FAME standards: their retention times (RT, seconds) and coefficients of variation of areas under curves between technical replications and biological samples

| RT (s.s) |      | Standards                                   | CV between technical replications, % |        |         |         |         | CV between samples. % |
|----------|------|---------------------------------------------|--------------------------------------|--------|---------|---------|---------|-----------------------|
|          |      |                                             | 0 days                               | 5 days | 10 days | 15 days | 20 days |                       |
| 465.99   | 1.98 | Octanoic acid, methyl ester                 | 13.2                                 | 12.7   | 10.3    | 11.7    | 10.4    | 3.0                   |
| 789.97   | 2.00 | Dodecanoic acid, methyl ester               | 14.1                                 | 12.4   | 7.1     | 11.9    | 10.7    | 2.6                   |
| 929.96   | 2.01 | Tetradecanoic acid, methyl ester            | 13.3                                 | 12.1   | 10.2    | 11.9    | 9.8     | 1.8                   |
| 985.96   | 2.11 | (Z)-10-Pentadecenoic acid, methyl ester     | 12.1                                 | 11.2   | 10.4    | 11.5    | 9.7     | 1.6                   |
| 993.96   | 2.02 | Pentadecanoic acid, methyl ester            | 8.8                                  | 11.9   | 10.0    | 10.8    | 9.3     | 2.3                   |
| 1053.95  | 2.04 | Hexadecanoic acid, methyl ester             | 11.8                                 | 10.6   | 8.5     | 10.4    | 9.2     | 1.8                   |
| 1113.95  | 2.05 | Heptadecanoic acid, methyl ester            | 11.7                                 | 10.7   | 9.2     | 11.0    | 9.0     | 2.0                   |
| 1145.95  | 2.28 | Gamma-Linolenic acid, methyl ester          | 11.7                                 | 11.6   | 9.3     | 10.3    | 8.9     | 2.5                   |
| 1153.95  | 2.15 | 9-Octadecenoic acid (Z)-, methyl ester      | 12.0                                 | 10.0   | 8.6     | 9.4     | 9.0     | 2.5                   |
| 1153.95  | 2.22 | 9.12-Octadecadienoic acid, methyl ester     | 10.9                                 | 12.4   | 9.6     | 9.0     | 9.1     | 2.5                   |
| 1157.95  | 2.29 | 9.12.15-Octadecatrienoic acid, methyl ester | 12.1                                 | 7.7    | 8.1     | 12.1    | 9.4     | 3.1                   |
| 1169.95  | 2.06 | Heptadecanoic acid, methyl ester            | 11.8                                 | 11.5   | 8.7     | 10.1    | 9.5     | 2.2                   |
| 1261.94  | 2.35 | 11.14.17-Eicosatrienoic acid, methyl ester  | 10.7                                 | 11.8   | 11.7    | 11.7    | 10.5    | 2.8                   |
| 1273.94  | 2.11 | Nonadecanoic acid, 18-methyl, methyl ester  | 12.8                                 | 11.6   | 9.7     | 10.8    | 10.1    | 1.8                   |
| 1321.94  | 2.15 | Eicosanoic acid, methyl ester               | 13.7                                 | 11.8   | 10.5    | 10.5    | 10.5    | 1.8                   |
| 1337.94  | 2.62 | Heneicosapentaenoic Acid methyl ester       | 13.1                                 | 14.9   | 10.1    | 11.1    | 9.8     | 3.3                   |
| 1357.94  | 2.33 | 11.14-Eicosadienoic acid, methyl ester      | 14.3                                 | 12.6   | 10.3    | 11.2    | 13.0    | 3.1                   |
| 1369.93  | 2.21 | Heneicosanoic acid, methyl ester            | 14.0                                 | 12.2   | 11.1    | 10.9    | 10.6    | 2.6                   |
| 1417.93  | 2.51 | Docosanoic acid, methyl ester               | 13.5                                 | 13.0   | 11.0    | 10.9    | 10.5    | 2.5                   |
| 1469.93  | 2.85 | Hexacontanoic acid, methyl ester            | 13.8                                 | 12.2   | 10.0    | 12.2    | 9.5     | 2.3                   |

**Supplementary Table S2.** Metabolites detected by GC×GC-MS in HepG2 cells and averaged F-ratios for the characteristic features of a given metabolite between five time points.

| #  | Metabolite                 | Derivative form | HMDB ID                     | F-ratio |
|----|----------------------------|-----------------|-----------------------------|---------|
| 1  | p-Hydroxyphenylacetic acid | 3TMS            | <a href="#">HMDB0000020</a> | 100.5   |
| 2  | 5'-Methylthioadenosine     | 3TMS            | <a href="#">HMDB0001173</a> | 49.6    |
| 3  | Pantothenic acid           | 3TMS            | <a href="#">HMDB0000210</a> | 517.1   |
| 4  | myo-Inositol               | 6TMS            | <a href="#">HMDB0000211</a> | 416.1   |
| 5  | Inositol phosphate         | 5TMS            | <a href="#">HMDB0002985</a> | 88.8    |
| 6  | scyllo-Inositol            | 6TMS            | <a href="#">HMDB0006088</a> | 86.5    |
| 7  | 2,3-Butanediol             | 2TMS            | <a href="#">HMDB0003156</a> | 78.1    |
| 8  | L-Lactic acid              | 2TMS            | <a href="#">HMDB0000190</a> | 324.4   |
| 9  | Cadaverine                 | 4TMS            | <a href="#">HMDB0002322</a> | 153.3   |
| 10 | Ethanolamine               | 3TMS            | <a href="#">HMDB0000149</a> | 25.2    |
| 11 | Spermidine                 | 1TMS            | <a href="#">HMDB0001257</a> | 162.9   |
| 12 | Creatine                   | 3TMS            | <a href="#">HMDB0000064</a> | 258.4   |
| 13 | Cysteinylglycine           | 1TMS            | <a href="#">HMDB0000078</a> | 169.8   |
| 14 | L-Cystathionine            | 4TMS            | <a href="#">HMDB0000099</a> | 63.3    |
| 15 | L-Glutamic acid            | 3TMS            | <a href="#">HMDB0000148</a> | 87.6    |
| 16 | L-Threonine                | 1TMS            | <a href="#">HMDB0000167</a> | 22.0    |
| 17 | L-Serine                   | 1TMS            | <a href="#">HMDB0000187</a> | 10.1    |
| 18 | Pyroglutamic acid          | 1TMS            | <a href="#">HMDB0000267</a> | 92.5    |
| 19 | Aminoadipic acid           | 3TMS            | <a href="#">HMDB0000510</a> | 103.3   |
| 20 | L-Cysteine                 | 3TMS            | <a href="#">HMDB0000574</a> | 20.2    |
| 21 | L-Glutamine                | 1TMS            | <a href="#">HMDB0000641</a> | 84.8    |
| 22 | N-Acetyl-L-aspartic acid   | 1TMS            | <a href="#">HMDB0000812</a> | 33.8    |
| 23 | L-Aspartic acid            | 1TMS            | <a href="#">HMDB0000191</a> | 52.9    |
| 24 | Glycine                    | 3TMS            | <a href="#">HMDB0000123</a> | 44.6    |
| 25 | L-Tyrosine                 | 1TMS            | <a href="#">HMDB0000158</a> | 108.8   |
| 26 | L-Phenylalanine            | 2TMS            | <a href="#">HMDB0000159</a> | 22.0    |
| 27 | L-Proline                  | 1TMS            | <a href="#">HMDB0000162</a> | 34.6    |

|    |                           |           |                             |       |
|----|---------------------------|-----------|-----------------------------|-------|
| 28 | L-Isoleucine              | 2TMS      | <a href="#">HMDB0000172</a> | 16.7  |
| 29 | L-Histidine               | 2TMS      | <a href="#">HMDB0000177</a> | 105.3 |
| 30 | L-Cystine                 | 4TMS      | <a href="#">HMDB0000192</a> | 83.6  |
| 31 | L-Methionine              | 1TMS      | <a href="#">HMDB0000696</a> | 27.2  |
| 32 | L-Valine                  | 2TMS      | <a href="#">HMDB0000883</a> | 23.5  |
| 33 | Aminomalonic acid         | MOX, TMS  | <a href="#">HMDB0001147</a> | 111.5 |
| 34 | L-Alanine                 | 1TMS      | <a href="#">HMDB0000161</a> | 43.2  |
| 35 | L-Norleucine              | 1TMS      | <a href="#">HMDB0001645</a> | 16.6  |
| 36 | 2-Aminobutyric acid       | 2TMS      | <a href="#">HMDB0000452</a> | 33.3  |
| 37 | L-Lysine                  | 4TMS      | <a href="#">HMDB0000182</a> | 174.2 |
| 38 | Phenylacetic acid         | 1TMS      | <a href="#">HMDB0000209</a> | 21.1  |
| 39 | L-Malic acid              | 3TMS      | <a href="#">HMDB0000156</a> | 88.5  |
| 40 | epsilon-Caprolactam       | none      | <a href="#">METPA0843</a>   | 32.4  |
| 41 | Melibiose                 | 8TMS, MOX | <a href="#">HMDB0000048</a> | 102.4 |
| 42 | Glycerol                  | 3TMS      | <a href="#">HMDB0000131</a> | 75.5  |
| 43 | D-Maltose                 | 8TMS, MOX | <a href="#">HMDB0000163</a> | 89.0  |
| 44 | Alpha-Lactose             | 8TMS      | <a href="#">HMDB0000186</a> | 68.8  |
| 45 | Ribitol                   | 5TMS      | <a href="#">HMDB0000508</a> | 170.5 |
| 46 | Gluconic acid             | 1TMS      | <a href="#">HMDB0000625</a> | 60.2  |
| 47 | Galactaric acid           | 6TMS      | <a href="#">HMDB0000639</a> | 140.2 |
| 48 | Rhamnose                  | 4TMS      | <a href="#">HMDB0000849</a> | 89.2  |
| 49 | Ribonic acid              | 4TMS      | <a href="#">HMDB0000867</a> | 98.0  |
| 50 | Threonic acid             | 4TMS      | <a href="#">HMDB0000943</a> | 107.0 |
| 51 | Fructose 1.6-bisphosphate | 1TMS      | <a href="#">HMDB0001058</a> | 96.8  |
| 52 | 6-Phosphogluconic acid    | 6TMS      | <a href="#">HMDB0001316</a> | 88.3  |
| 53 | Ribose 1-phosphate        | 5TMS      | <a href="#">HMDB0001489</a> | 99.4  |
| 54 | Mannitol 1-phosphate      | 5TMS      | <a href="#">HMDB0001530</a> | 81.3  |
| 55 | Galacturonic acid         | 5 TMS     | <a href="#">HMDB0002545</a> | 88.0  |

|    |                               |           |                             |       |
|----|-------------------------------|-----------|-----------------------------|-------|
| 56 | Erythrose                     | 3TMS      | <a href="#">HMDB0002649</a> | 87.9  |
| 57 | Erythritol                    | 4TMS      | <a href="#">HMDB0002994</a> | 61.0  |
| 58 | Deoxyribose                   | 3TMS      | <a href="#">HMDB0003224</a> | 147.8 |
| 59 | Pectin                        | 1TMS      | <a href="#">HMDB0003402</a> | 78.7  |
| 60 | D-Tagatose                    | 1TMS      | <a href="#">HMDB0003418</a> | 117.6 |
| 61 | D-Glucuronic acid 1-phosphate | 5TMS      | <a href="#">HMDB0003976</a> | 97.4  |
| 62 | Lactose                       | 8TMS, MOX | <a href="#">HMDB0041627</a> | 84.3  |
| 63 | D-Ribose                      | 4TMS, MOX | <a href="#">HMDB0000283</a> | 132.1 |
| 64 | D-Ribulose 5-phosphate        | 5TMS, MOX | <a href="#">HMDB0000618</a> | 141.6 |
| 65 | D-Ribose 5-phosphate          | 5TMS, MOX | <a href="#">HMDB0001548</a> | 169.2 |
| 66 | Glucose 1-phosphate           | 6 TMS     | <a href="#">HMDB0001586</a> | 162.1 |
| 67 | L-Arabitol                    | 5TMS      | <a href="#">HMDB0001851</a> | 142.1 |
| 68 | D-Threitol                    | 4TMS      | <a href="#">HMDB0004136</a> | 122.4 |
| 69 | Arabinofuranose               | 4TMS      | <a href="#">HMDB0012325</a> | 63.6  |
| 70 | D-Glucose                     | 5TMS, MOX | <a href="#">HMDB0000122</a> | 169.1 |
| 71 | Fructose 6-phosphate          | 6TMS, MOX | <a href="#">HMDB0000124</a> | 74.4  |
| 72 | Glyceric acid                 | 3TMS      | <a href="#">HMDB0000139</a> | 69.6  |
| 73 | D-Galactose                   | 5TMS, MOX | <a href="#">HMDB0000143</a> | 270.3 |
| 74 | D-Mannose                     | 5TMS, MOX | <a href="#">HMDB0000169</a> | 100.8 |
| 75 | N-Acetylgalactosamine         | 4TMS, MOX | <a href="#">HMDB0000212</a> | 84.7  |
| 76 | 3-Phosphoglyceric acid        | 4TMS      | <a href="#">HMDB0000807</a> | 781.4 |
| 77 | Glucose 6-phosphate           | 6TMS, MOX | <a href="#">HMDB0001401</a> | 116.1 |
| 78 | Cholesterol                   | TMS       | <a href="#">HMDB0000067</a> | 122.3 |
| 79 | Fumaric acid                  | 2TMS      | <a href="#">HMDB0000134</a> | 68.4  |
| 80 | Glutaric acid                 | 3 TMS     | <a href="#">HMDB0000661</a> | 95.2  |
| 81 | Malonic acid                  | 2 TMS     | <a href="#">HMDB0000691</a> | 50.0  |
| 82 | Oxalic acid                   | 2 TMS     | <a href="#">HMDB0002329</a> | 31.1  |
| 83 | Succinic acid                 | 2 TMS     | <a href="#">HMDB0000254</a> | 57.0  |

|     |                          |            |                             |        |
|-----|--------------------------|------------|-----------------------------|--------|
| 84  | Adipic acid              | 2 TMS, MOX | <a href="#">HMDB0000448</a> | 102.3  |
| 85  | Azelaic acid             | 2 TMS      | <a href="#">HMDB0000784</a> | 20.6   |
| 86  | Oleic acid               | 1 TMS      | <a href="#">HMDB0000207</a> | 76.7   |
| 87  | Arachidonic acid         | 1 TMS      | <a href="#">HMDB0001043</a> | 301.7  |
| 88  | Docosahexaenoic acid     | 1 TMS      | <a href="#">HMDB0002183</a> | 1630.1 |
| 89  | Palmitoleic acid         | 1 TMS      | <a href="#">HMDB0003229</a> | 88.3   |
| 90  | Oleamide                 | none       | <a href="#">HMDB0002117</a> | 61.5   |
| 91  | Glycerol 3-phosphate     | 4 TMS      | <a href="#">HMDB0000126</a> | 116.3  |
| 92  | L-Tryptophan             | 2 TMS      | <a href="#">HMDB0000929</a> | 85.4   |
| 93  | MG(0:0/16:0/0:0)         | 2 TMS      | <a href="#">HMDB0011533</a> | 223.3  |
| 94  | MG(0:0/18:1(9Z)/0:0)     | 1 TMS      | <a href="#">HMDB0011537</a> | 190.2  |
| 95  | MG(18:1(9Z)/0:0/0:0)     | 2 TMS      | <a href="#">HMDB0011567</a> | 184.4  |
| 96  | Phosphate                | 3 TMS      | <a href="#">HMDB0001429</a> | 42.9   |
| 97  | Pyrophosphate            | 4 TMS      | <a href="#">HMDB0000250</a> | 132.6  |
| 98  | Adenosine                | 4 TMS      | <a href="#">HMDB0000050</a> | 164.2  |
| 99  | Inosine                  | 4 TMS      | <a href="#">HMDB0000195</a> | 247.7  |
| 100 | 1-Methyladenosine        | 3 TMS      | <a href="#">HMDB0003331</a> | 31.2   |
| 101 | Adenosine monophosphate  | 5 TMS      | <a href="#">HMDB0000045</a> | 190.4  |
| 102 | Guanosine monophosphate  | 6 TMS      | <a href="#">HMDB0001397</a> | 84.4   |
| 103 | Inosinic acid            | 5 TMS      | <a href="#">HMDB0000175</a> | 63.6   |
| 104 | Adenine                  | 2 TMS      | <a href="#">HMDB0000034</a> | 156.7  |
| 105 | Hypoxanthine             | 2 TMS      | <a href="#">HMDB0000157</a> | 323.1  |
| 106 | Xanthine                 | 3 TMS      | <a href="#">HMDB0000292</a> | 183.3  |
| 107 | Uridine                  | 3 TMS      | <a href="#">HMDB0000296</a> | 244.1  |
| 108 | Uridine 5'-monophosphate | 5 TMS      | <a href="#">HMDB0000288</a> | 87.1   |
| 109 | Uracil                   | 2 TMS      | <a href="#">HMDB0000300</a> | 31.3   |
| 110 | Citric acid              | 4 TMS      | <a href="#">HMDB0000094</a> | 191.7  |

TMS - trimethylsilyl group;  
MOX. O-methoxyamine group

**Supplementary Table S3.** Identifiers of metabolites included in the clusters #1, 2 and 3.

| Cluster 1   |             |             |             |             |
|-------------|-------------|-------------|-------------|-------------|
| HMDB0000034 | HMDB0000045 | HMDB0000048 | HMDB0000050 | HMDB0000064 |
| HMDB0000078 | HMDB0000094 | HMDB0000099 | HMDB0000126 | HMDB0000131 |
| HMDB0000134 | HMDB0000148 | HMDB0000156 | HMDB0000163 | HMDB0000167 |
| HMDB0000186 | HMDB0000187 | HMDB0000191 | HMDB0000210 | HMDB000021  |
| HMDB0000250 | HMDB0000267 | HMDB0000288 | HMDB0000448 | HMDB0000508 |
| HMDB0000510 | HMDB0000574 | HMDB0000625 | HMDB0000639 | HMDB0000641 |
| HMDB0000661 | HMDB0000691 | HMDB0000784 | HMDB0000812 | HMDB0000849 |
| HMDB0000867 | HMDB0000943 | HMDB0001058 | HMDB0001173 | HMDB0001316 |
| HMDB0001397 | HMDB0001489 | HMDB0001530 | HMDB0002322 | HMDB0002329 |
| HMDB0002545 | HMDB0002649 | HMDB0002985 | HMDB0002994 | HMDB0003224 |
| HMDB0003331 | HMDB0003402 | HMDB0003418 | HMDB0003976 | HMDB0006088 |
| HMDB0041627 |             |             |             |             |
| Cluster #2  |             |             |             |             |
| HMDB0000020 | HMDB0000123 | HMDB0000149 | HMDB0000157 | HMDB0000158 |
| HMDB0000159 | HMDB0000161 | HMDB0000162 | HMDB0000172 | HMDB0000175 |
| HMDB0000177 | HMDB0000190 | HMDB0000192 | HMDB0000195 | HMDB0000254 |
| HMDB0000283 | HMDB0000292 | HMDB0000296 | HMDB0000452 | HMDB0000618 |
| HMDB0000696 | HMDB0000883 | HMDB0000929 | HMDB0001147 | HMDB0001257 |
| HMDB0001548 | HMDB0001586 | HMDB0001645 | HMDB0001851 | HMDB0003156 |
| HMDB0004136 | HMDB0012325 |             |             |             |
| Cluster #3  |             |             |             |             |
| HMDB0000067 | HMDB0000122 | HMDB0000124 | HMDB0000139 | HMDB0000143 |
| HMDB0000169 | HMDB0000182 | HMDB0000207 | HMDB0000209 | HMDB0000212 |
| HMDB0000300 | HMDB0000807 | HMDB0001043 | HMDB0001401 | HMDB0001429 |
| HMDB0002117 | HMDB0002183 | HMDB0003229 | HMDB0011533 | HMDB0011537 |
| HMDB0011567 | METPA0843   |             |             |             |



**Supplementary Table S4.** Pathways with the highest significance according to the MetaboAnalyst analysis against the KEGG library.

| Pathway                                     | Total                                                                                                                                                                                                                                                                                                                                                                                                                                                                                                                                                                                                                                                                                                                                                                                                                                                                                                                                                                                                         | Hits | Raw p                   | Impact  |
|---------------------------------------------|---------------------------------------------------------------------------------------------------------------------------------------------------------------------------------------------------------------------------------------------------------------------------------------------------------------------------------------------------------------------------------------------------------------------------------------------------------------------------------------------------------------------------------------------------------------------------------------------------------------------------------------------------------------------------------------------------------------------------------------------------------------------------------------------------------------------------------------------------------------------------------------------------------------------------------------------------------------------------------------------------------------|------|-------------------------|---------|
| Aminoacyl-tRNA biosynthesis                 | 48                                                                                                                                                                                                                                                                                                                                                                                                                                                                                                                                                                                                                                                                                                                                                                                                                                                                                                                                                                                                            | 17   | 3.2197×10 <sup>-9</sup> | 0.16667 |
|                                             | List                                                                                                                                                                                                                                                                                                                                                                                                                                                                                                                                                                                                                                                                                                                                                                                                                                                                                                                                                                                                          |      |                         |         |
|                                             | L-Asparagine; <b>L-Histidine</b> ; <b>L-Phenylalanine</b> ; L-Arginine; <b>L-Glutamine</b> ; <b>L-Cysteine</b> ; <b>Glycine</b> ; <b>L-Aspartate</b> ; <b>L-Serine</b> ; <b>L-Methionine</b> ; <b>L-Valine</b> ; <b>L-Alanine</b> ; <b>L-Lysine</b> ; <b>L-Isoleucine</b> ; L-Leucine; <b>L-Threonine</b> ; <b>L-Tryptophan</b> ; L-Methionyl-tRNA; 10-Formyltetrahydrofolate; <b>L-Tyrosine</b> ; <b>L-Proline</b> ; <b>L-Glutamate</b> ; Glutamyl-tRNA; L-Asparaginyl-tRNA(Asn); L-Seryl-tRNA(Sec); O-Phosphoseryl-tRNA(Sec); L-Histidyl-tRNA(His); L-Phenylalanyl-tRNA(Phe); L-Arginyl-tRNA(Arg); L-Cysteinyl-tRNA(Cys); Glycyl-tRNA(Gly); L-Aspartyl-tRNA(Asp); L-Seryl-tRNA(Ser); L-Valyl-tRNA(Val); L-Alanyl-tRNA; L-Lysyl-tRNA; L-Isoleucyl-tRNA(Ile); L-Leucyl-tRNA; L-Threonyl-tRNA(Thr); L-Tryptophanyl-tRNA(Trp); Tetrahydrofolate; N-Formylmethionyl-tRNA; L-Tyrosyl-tRNA(Tyr); L-Prolyl-tRNA(Pro); L-Glutamyl-tRNA(Glu); L-Glutamyl-tRNA(Gln); L-Aspartyl-tRNA(Asn); L-Selenocysteinyl-tRNA(Sec) |      |                         |         |
| Pentose phosphate pathway                   | Total                                                                                                                                                                                                                                                                                                                                                                                                                                                                                                                                                                                                                                                                                                                                                                                                                                                                                                                                                                                                         | Hits | Raw p                   | Impact  |
|                                             | 22                                                                                                                                                                                                                                                                                                                                                                                                                                                                                                                                                                                                                                                                                                                                                                                                                                                                                                                                                                                                            | 9    | 5.5058×10 <sup>-6</sup> | 0.47103 |
|                                             | List                                                                                                                                                                                                                                                                                                                                                                                                                                                                                                                                                                                                                                                                                                                                                                                                                                                                                                                                                                                                          |      |                         |         |
|                                             | alpha-D-Glucose 6-phosphate; <b>Deoxyribose</b> ; 2-Deoxy-D-ribose 1-phosphate; 2-Deoxy-D-ribose 5-phosphate; <b>D-Ribose 5-phosphate</b> ; <b>alpha-D-Ribose 1-phosphate</b> ; <b>D-Ribose</b> ; Sedoheptulose 7-phosphate; D-Glyceraldehyde 3-phosphate; <b>D-Ribulose 5-phosphate</b> ; beta-D-Fructose 6-phosphate; <b>beta-D-Fructose 1,6-bisphosphate</b> ; <b>6-Phospho-D-gluconate</b> ; D-Glucono-1,5-lactone 6-phosphate; beta-D-Glucose 6-phosphate; <b>D-Gluconic acid</b> ; D-Glucono-1,5-lactone; <b>D-Glycerate</b> ; 5-Phospho-alpha-D-ribose 1-diphosphate; D-Xylulose 5-phosphate; D-Erythrose 4-phosphate; 2-Phospho-D-glycerate                                                                                                                                                                                                                                                                                                                                                           |      |                         |         |
| Alanine, aspartate and glutamate metabolism | Total                                                                                                                                                                                                                                                                                                                                                                                                                                                                                                                                                                                                                                                                                                                                                                                                                                                                                                                                                                                                         | Hits | Raw p                   | Impact  |
|                                             | 28                                                                                                                                                                                                                                                                                                                                                                                                                                                                                                                                                                                                                                                                                                                                                                                                                                                                                                                                                                                                            | 8    | 3.6195×10 <sup>-4</sup> | 0.6234  |
|                                             | List                                                                                                                                                                                                                                                                                                                                                                                                                                                                                                                                                                                                                                                                                                                                                                                                                                                                                                                                                                                                          |      |                         |         |
|                                             | <b>N-Acetyl-L-aspartate</b> ; 2-Oxosuccinamate; <b>L-Aspartate</b> ; L-Asparagine; D-Aspartate; N-(L-Arginino)succinate; N6-(1,2-Dicarboxyethyl)-AMP; <b>L-Alanine</b> ; Succinate semialdehyde; <b>L-Glutamate</b> ; 4-Aminobutanoate; <b>L-Glutamine</b> ; Ammonia; 2-Oxoglutaramate; (S)-1-Pyrroline-5-carboxylate; N-Acetylaspartylglutamate; N-Acetylaspartylglutamylglutamate; <b>Citrate</b> ; Oxaloacetate; <b>Fumarate</b> ; Pyruvate; N-Carbamoyl-L-aspartate; <b>Succinate</b> ; 2-Oxoglutarate; Carbamoyl phosphate; D-Glucosamine 6-phosphate; 5-Phosphoribosylamine; beta-Citryl-L-glutamate                                                                                                                                                                                                                                                                                                                                                                                                    |      |                         |         |
| Glutathione metabolism                      | Total                                                                                                                                                                                                                                                                                                                                                                                                                                                                                                                                                                                                                                                                                                                                                                                                                                                                                                                                                                                                         | Hits | Raw p                   | Impact  |
|                                             | 28                                                                                                                                                                                                                                                                                                                                                                                                                                                                                                                                                                                                                                                                                                                                                                                                                                                                                                                                                                                                            | 7    | 0.0020499               | 0.1829  |
|                                             | List                                                                                                                                                                                                                                                                                                                                                                                                                                                                                                                                                                                                                                                                                                                                                                                                                                                                                                                                                                                                          |      |                         |         |
|                                             | R-S-Cysteinylglycine; R-S-Glutathione; Glutathione; NADP <sup>+</sup> ; Glutathione disulfide; NADPH; <b>Glycine</b> ; gamma-L-Glutamyl-L-cysteine; <b>L-Glutamate</b> ; <b>L-Cysteine</b> ; <b>Cys-Gly</b> ; <b>5-Oxoproline</b> ; L-Amino acid; (5-L-Glutamyl)-L-amino acid; S-Substituted L-cysteine; Acetyl-CoA; RX; L-Ornithine; Putrescine; <b>Spermidine</b> ; <b>Cadaverine</b> ; Tryparedoxin; Trypanothione; S-Substituted N-acetyl-L-cysteine; Spermine; Aminopropylcadaverine; Tryparedoxin disulfide; Trypanothione disulfide                                                                                                                                                                                                                                                                                                                                                                                                                                                                    |      |                         |         |
| Purine metabolism                           | Total                                                                                                                                                                                                                                                                                                                                                                                                                                                                                                                                                                                                                                                                                                                                                                                                                                                                                                                                                                                                         | Hits | Raw p                   | Impact  |
|                                             | 65                                                                                                                                                                                                                                                                                                                                                                                                                                                                                                                                                                                                                                                                                                                                                                                                                                                                                                                                                                                                            | 11   | 0.0035423               | 0,31629 |
|                                             | List                                                                                                                                                                                                                                                                                                                                                                                                                                                                                                                                                                                                                                                                                                                                                                                                                                                                                                                                                                                                          |      |                         |         |

|                                          |                                                                                                                                                                                                                                                                                                                                                                                                                                                                                                                                                                                                                                                                                                                                                                                                                                                                                                                                                                                                                                                                                                                                                                                                                                                                                                                                                                                                                                                    |             |                       |               |
|------------------------------------------|----------------------------------------------------------------------------------------------------------------------------------------------------------------------------------------------------------------------------------------------------------------------------------------------------------------------------------------------------------------------------------------------------------------------------------------------------------------------------------------------------------------------------------------------------------------------------------------------------------------------------------------------------------------------------------------------------------------------------------------------------------------------------------------------------------------------------------------------------------------------------------------------------------------------------------------------------------------------------------------------------------------------------------------------------------------------------------------------------------------------------------------------------------------------------------------------------------------------------------------------------------------------------------------------------------------------------------------------------------------------------------------------------------------------------------------------------|-------------|-----------------------|---------------|
|                                          | GDP; <b>Xanthine</b> ; <b>D-Ribose 5-phosphate</b> ; <b>L-Glutamine</b> ; 5-Phospho-alpha-D-ribose 1-diphosphate; 5-Phosphoribosylamine; 5'-Phosphoribosylglycinamide; 2-(Formamido)-N1-(5'-phosphoribosyl)acetamidine; 1-(5'-Phosphoribosyl)-5-amino-4-imidazolecarboxamide; 1-(5'-Phosphoribosyl)-5-amino-4-(N-succinocarboxamide)-imidazole; 1-(5-Phospho-D-ribose)-5-amino-4-imidazolecarboxylate; 1-(5'-Phosphoribosyl)-5-formamido-4-imidazolecarboxamide; 3',5'-Cyclic AMP; ATP; ADP; dADP; <b>AMP</b> ; N6-(1,2-Dicarboxyethyl)-AMP; <b>IMP</b> ; <b>Adenosine</b> ; dAMP; Deoxyadenosine; Deoxyinosine; Xanthosine; IDP; <b>GMP</b> ; Xanthosine 5'-phosphate; <b>Hypoxanthine</b> ; <b>Inosine</b> ; Guanine; Deoxyguanosine; Allantoate; Guanosine 3',5'-bis(diphosphate); Guanosine 3'-diphosphate 5'-triphosphate; GTP; dGMP; dGDP; Guanosine; 3',5'-Cyclic GMP; Sulfate; Adenyl sulfite; 5'-Phosphoribosyl-N-formylglycinamide; ITP; XTP; P1,P4-Bis(5'-adenosyl)tetrphosphate; dGTP; P1,P4-Bis(5'-xanthosyl) tetrphosphate; <b>alpha-D-Ribose 1-phosphate</b> ; ADP-ribose; <b>Adenine</b> ; dIDP; dITP; P1,P3-Bis(5'-adenosyl) triphosphate; dATP; 5-Hydroxy-2-oxo-4-ureido-2,5-dihydro-1H-imidazole-5-carboxylate; Urate; Aminoimidazole ribotide; Ammonia; (S)-Ureidoglycolate; Urea; 3'-Phosphoadenyl sulfite; P1,P4-Bis(5'-guanosyl) tetrphosphate; 2'-Deoxyinosine 5'-phosphate; 5-Amino-4-imidazolecarboxamide; (S)-Allantoin |             |                       |               |
| Glyoxylate and dicarboxylate metabolism  | <b>Total</b>                                                                                                                                                                                                                                                                                                                                                                                                                                                                                                                                                                                                                                                                                                                                                                                                                                                                                                                                                                                                                                                                                                                                                                                                                                                                                                                                                                                                                                       | <b>Hits</b> | <b>Raw p</b>          | <b>Impact</b> |
|                                          | 32                                                                                                                                                                                                                                                                                                                                                                                                                                                                                                                                                                                                                                                                                                                                                                                                                                                                                                                                                                                                                                                                                                                                                                                                                                                                                                                                                                                                                                                 | 7           | 0.0046375             | 0.25927       |
|                                          | <b>List</b>                                                                                                                                                                                                                                                                                                                                                                                                                                                                                                                                                                                                                                                                                                                                                                                                                                                                                                                                                                                                                                                                                                                                                                                                                                                                                                                                                                                                                                        |             |                       |               |
|                                          | Hydroxypyruvate; cis-Aconitate; 4-Hydroxy-2-oxoglutarate; N-Formyl derivatives; Glycolate; <b>Citrate</b> ; <b>(S)-Malate</b> ; 2-Phosphoglycolate; Acetyl-CoA; (S)-Methylmalonyl-CoA; Propanoyl-CoA; (R)-Methylmalonyl-CoA; Glyoxylate; <b>L-Serine</b> ; <b>Glycine</b> ; Hydrogen peroxide; <b>L-Glutamate</b> ; (2S)-Ethylmalonyl-CoA; <b>D-Glycerate</b> ; Acetate; 2-Hydroxy-3-oxopropanoate; Isocitrate; Pyruvate; Formate; Oxaloacetate; Acetoacetyl-CoA; Succinyl-CoA; Ammonia; Oxygen; <b>L-Glutamine</b> ; (2R)-Ethylmalonyl-CoA; 2-Phospho-D-glycerate                                                                                                                                                                                                                                                                                                                                                                                                                                                                                                                                                                                                                                                                                                                                                                                                                                                                                 |             |                       |               |
| Cysteine and methionine metabolism       | <b>Total</b>                                                                                                                                                                                                                                                                                                                                                                                                                                                                                                                                                                                                                                                                                                                                                                                                                                                                                                                                                                                                                                                                                                                                                                                                                                                                                                                                                                                                                                       | <b>Hits</b> | <b>Raw p</b>          | <b>Impact</b> |
|                                          | 33                                                                                                                                                                                                                                                                                                                                                                                                                                                                                                                                                                                                                                                                                                                                                                                                                                                                                                                                                                                                                                                                                                                                                                                                                                                                                                                                                                                                                                                 | 6           | 0.00556               | 0.46344       |
|                                          | <b>List</b>                                                                                                                                                                                                                                                                                                                                                                                                                                                                                                                                                                                                                                                                                                                                                                                                                                                                                                                                                                                                                                                                                                                                                                                                                                                                                                                                                                                                                                        |             |                       |               |
|                                          | 4-Methylthio-2-oxobutanoic acid; 1,2-Dihydroxy-5-(methylthio)pent-1-en-3-one; S-Methyl-5-thio-D-ribulose 1-phosphate; S-Methyl-5-thio-D-ribose 1-phosphate; <b>5'-Methylthioadenosine</b> ; S-Adenosylmethioninamine; S-Adenosyl-L-methionine; <b>L-Cystathionine</b> ; <b>L-Serine</b> ; L-Homocysteine; <b>L-Methionine</b> ; S-Adenosyl-L-homocysteine; 2,3-Diketo-5-methylthiopentyl-1-phosphate; L-Cysteate; <b>L-Cystine</b> ; <b>L-Cysteine</b> ; 3-Sulfinyl-L-alanine; Mercaptopyruvate; (2R)-3-Sulfolactate; gamma-L-Glutamyl-L-2-aminobutyrate; <b>(S)-2-Aminobutanoate</b> ; 2-Oxobutanoate; O-Phospho-L-serine; 3-Phosphonooxypyruvate; 3-(Methylthio)propanoate; Dehydroalanine; 3-Sulfolpyruvate; Thiocysteine; 3-Sulfinylpyruvate; Pyruvate; 3-Mercaptolactate; Ophthamate; 3-Phospho-D-glycerate                                                                                                                                                                                                                                                                                                                                                                                                                                                                                                                                                                                                                                   |             |                       |               |
| Glycine; serine and threonine metabolism | <b>Total</b>                                                                                                                                                                                                                                                                                                                                                                                                                                                                                                                                                                                                                                                                                                                                                                                                                                                                                                                                                                                                                                                                                                                                                                                                                                                                                                                                                                                                                                       | <b>Hits</b> | <b>Raw p</b>          | <b>Impact</b> |
|                                          | 33                                                                                                                                                                                                                                                                                                                                                                                                                                                                                                                                                                                                                                                                                                                                                                                                                                                                                                                                                                                                                                                                                                                                                                                                                                                                                                                                                                                                                                                 | 7           | 5.56×10 <sup>-3</sup> | 0.48704       |
|                                          | <b>List</b>                                                                                                                                                                                                                                                                                                                                                                                                                                                                                                                                                                                                                                                                                                                                                                                                                                                                                                                                                                                                                                                                                                                                                                                                                                                                                                                                                                                                                                        |             |                       |               |
|                                          | <b>L-Serine</b> ; Choline; Betaine aldehyde; Betaine; Guanidinoacetate; 3-Phospho-D-glycerate; N,N-Dimethylglycine; <b>L-Cystathionine</b> ; <b>Glycine</b> ; O-Phospho-L-serine; Sarcosine; 5,10-Methylenetetrahydrofolate; <b>L-Threonine</b> ; Lipoylprotein; Aminoacetone; <b>D-Glycerate</b> ; [Protein]-S8-aminomethyldihydrolipoyllysine; Tetrahydrofolate; Dihydrolipoylprotein; 2-Phospho-D-glycerate; D-Serine; Hydroxypyruvate; <b>Creatine</b> ; 3-Phosphonooxypyruvate; <b>L-Cysteine</b> ; 2-Oxobutanoate; Glyoxylate; L-2-Amino-3-oxobutanoic acid; Pyruvate; CO <sub>2</sub> ; 5-Aminolevulinate; Methylglyoxal; Ammonia                                                                                                                                                                                                                                                                                                                                                                                                                                                                                                                                                                                                                                                                                                                                                                                                           |             |                       |               |
| Pantothenate and CoA biosynthesis        | <b>Total</b>                                                                                                                                                                                                                                                                                                                                                                                                                                                                                                                                                                                                                                                                                                                                                                                                                                                                                                                                                                                                                                                                                                                                                                                                                                                                                                                                                                                                                                       | <b>Hits</b> | <b>Raw p</b>          | <b>Impact</b> |
|                                          | 19                                                                                                                                                                                                                                                                                                                                                                                                                                                                                                                                                                                                                                                                                                                                                                                                                                                                                                                                                                                                                                                                                                                                                                                                                                                                                                                                                                                                                                                 | 5           | 0.0073071             | 0.00714       |
|                                          | <b>List</b>                                                                                                                                                                                                                                                                                                                                                                                                                                                                                                                                                                                                                                                                                                                                                                                                                                                                                                                                                                                                                                                                                                                                                                                                                                                                                                                                                                                                                                        |             |                       |               |
|                                          | Dephospho-CoA; Pantetheine 4'-phosphate; Pantetheine; (R)-4'-Phosphopantothenoate-L-cysteine; N-((R)-Pantothenoate)-L-cysteine; <b>Pantothenate</b> ; 3-Ureidopropionate; 5,6-Dihydrouacil; <b>L-Valine</b> ; <b>L-Aspartate</b> ; Apo-[acyl-carrier-protein]; CoA; D-4'-Phosphopantothenoate; <b>L-Cysteine</b> ; beta-Alanine; <b>Uracil</b> ; 3-Methyl-2-oxobutanoic acid; Adenosine 3',5'-bisphosphate; Acyl-carrier protein                                                                                                                                                                                                                                                                                                                                                                                                                                                                                                                                                                                                                                                                                                                                                                                                                                                                                                                                                                                                                   |             |                       |               |

|                                                     |                                                                                                                                                                                                                                                                                                                                                                                                                                                                                                                                                          |             |              |               |
|-----------------------------------------------------|----------------------------------------------------------------------------------------------------------------------------------------------------------------------------------------------------------------------------------------------------------------------------------------------------------------------------------------------------------------------------------------------------------------------------------------------------------------------------------------------------------------------------------------------------------|-------------|--------------|---------------|
| Arginine biosynthesis                               | <b>Total</b>                                                                                                                                                                                                                                                                                                                                                                                                                                                                                                                                             | <b>Hits</b> | <b>Raw p</b> | <b>Impact</b> |
|                                                     | 14                                                                                                                                                                                                                                                                                                                                                                                                                                                                                                                                                       | 4           | 0.012126     | 0.11675       |
|                                                     | <b>List</b>                                                                                                                                                                                                                                                                                                                                                                                                                                                                                                                                              |             |              |               |
|                                                     | <b>L-Glutamate</b> ; L-Arginine; N-Acetylornithine; N-(L-Arginino)succinate; L-Citrulline; <b>L-Aspartate</b> ; Carbamoyl phosphate; L-Ornithine; Ammonia; <b>L-Glutamine</b> ; 2-Oxoglutarate; N-Acetyl-L-glutamate; Urea; <b>Fumarate</b>                                                                                                                                                                                                                                                                                                              |             |              |               |
| Valine, leucine and isoleucine biosynthesis         | <b>Total</b>                                                                                                                                                                                                                                                                                                                                                                                                                                                                                                                                             | <b>Hits</b> | <b>Raw p</b> | <b>Impact</b> |
|                                                     | 8                                                                                                                                                                                                                                                                                                                                                                                                                                                                                                                                                        | 3           | 0.013521     | 0.0           |
|                                                     | <b>List</b>                                                                                                                                                                                                                                                                                                                                                                                                                                                                                                                                              |             |              |               |
|                                                     | <b>L-Threonine</b> ; (S)-3-Methyl-2-oxopentanoic acid; L-Leucine; 3-Methyl-2-oxobutanoic acid; 2-Oxobutanoate; <b>L-Isoleucine</b> ; 4-Methyl-2-oxopentanoate; <b>L-Valine</b>                                                                                                                                                                                                                                                                                                                                                                           |             |              |               |
| Phenylalanine, tyrosine and tryptophan biosynthesis | <b>Total</b>                                                                                                                                                                                                                                                                                                                                                                                                                                                                                                                                             | <b>Hits</b> | <b>Raw p</b> | <b>Impact</b> |
|                                                     | 4                                                                                                                                                                                                                                                                                                                                                                                                                                                                                                                                                        | 2           | 0.025385     | 1.0           |
|                                                     | <b>List</b>                                                                                                                                                                                                                                                                                                                                                                                                                                                                                                                                              |             |              |               |
|                                                     | Phenylpyruvate; <b>L-Phenylalanine</b> ; <b>L-Tyrosine</b> ; 3-(4-Hydroxyphenyl)pyruvate                                                                                                                                                                                                                                                                                                                                                                                                                                                                 |             |              |               |
| Phenylalanine metabolism                            | <b>Total</b>                                                                                                                                                                                                                                                                                                                                                                                                                                                                                                                                             | <b>Hits</b> | <b>Raw p</b> | <b>Impact</b> |
|                                                     | 10                                                                                                                                                                                                                                                                                                                                                                                                                                                                                                                                                       | 3           | 0.0262       | 0.35714       |
|                                                     | <b>List</b>                                                                                                                                                                                                                                                                                                                                                                                                                                                                                                                                              |             |              |               |
|                                                     | Phenylacetaldehyde; <b>L-Phenylalanine</b> ; Phenethylamine; Phenylpyruvate; Benzoyl-CoA; <b>Phenylacetic acid</b> ; 2-Hydroxyphenylacetate; 2-Hydroxy-3-phenylpropenoate; Hippurate; <b>L-Tyrosine</b>                                                                                                                                                                                                                                                                                                                                                  |             |              |               |
| Starch and sucrose metabolism                       | <b>Total</b>                                                                                                                                                                                                                                                                                                                                                                                                                                                                                                                                             | <b>Hits</b> | <b>Raw p</b> | <b>Impact</b> |
|                                                     | 18                                                                                                                                                                                                                                                                                                                                                                                                                                                                                                                                                       | 4           | 0.029991     | 0.36469       |
|                                                     | <b>List</b>                                                                                                                                                                                                                                                                                                                                                                                                                                                                                                                                              |             |              |               |
|                                                     | Cellodextrin; Cellobiose; D-Fructose; Sucrose; beta-D-Glucoside; UDP-glucose; <b>D-Glucose 1-phosphate</b> ; <b>D-Glucose 6-phosphate</b> ; D-Glucose; Amylose; alpha,alpha-Trehalose; Maltodextrin; Starch; <b>Maltose</b> ; Dextrin; Isomaltose; <b>D-Fructose 6-phosphate</b> ; alpha-D-Glucose 1,6-bisphosphate                                                                                                                                                                                                                                      |             |              |               |
| Galactose metabolism                                | <b>Total</b>                                                                                                                                                                                                                                                                                                                                                                                                                                                                                                                                             | <b>Hits</b> | <b>Raw p</b> | <b>Impact</b> |
|                                                     | 27                                                                                                                                                                                                                                                                                                                                                                                                                                                                                                                                                       | 5           | 0.03275      | 0.17315       |
|                                                     | <b>List</b>                                                                                                                                                                                                                                                                                                                                                                                                                                                                                                                                              |             |              |               |
|                                                     | Stachyose; D-Tagatose 6-phosphate; D-Gal alpha 1->6D-Gal alpha 1->6D-Glucose; Sucrose; Raffinose; Melibiose; D-Galactose; 3-beta-D-Galactosyl-sn-glycerol; Epimelibiose; Melibiitol; alpha-D-Galactosyl-(1->3)-1D-myo-inositol; alpha-D-Glucose; <b>Lactose</b> ; <b>D-Glucose 1-phosphate</b> ; UDP-alpha-D-galactose; UDP-glucose; alpha-D-Galactose 1-phosphate; <b>alpha-D-Galactose</b> ; alpha-D-Glucose 6-phosphate; D-Tagatose 1,6-bisphosphate; D-Glucose; D-Fructose; Galactitol; <b>Glycerol</b> ; D-Mannose; D-Sorbitol; <b>myo-Inositol</b> |             |              |               |
| Citrate cycle (TCA cycle)                           | <b>Total</b>                                                                                                                                                                                                                                                                                                                                                                                                                                                                                                                                             | <b>Hits</b> | <b>Raw p</b> | <b>Impact</b> |
|                                                     | 20                                                                                                                                                                                                                                                                                                                                                                                                                                                                                                                                                       | 4           | 0.042744     | 0.19704       |
|                                                     | <b>List</b>                                                                                                                                                                                                                                                                                                                                                                                                                                                                                                                                              |             |              |               |
|                                                     | Enzyme N6-(dihydrolipoyl)lysine; 2-Oxoglutarate; Thiamin diphosphate; Enzyme N6-(lipoyl)lysine; 3-Carboxy-1-hydroxypropyl-ThPP; Succinyl-CoA; <b>Succinate</b> ; Oxalosuccinate; Isocitrate; Oxaloacetate; Acetyl-CoA; <b>(S)-Malate</b> ; cis-Aconitate; <b>Citrate</b> ; Pyruvate; 2-(alpha-Hydroxyethyl)thiamine diphosphate; [Dihydrolipoyllysine-residue succinyltransferase] S-succinyl-dihydrolipoyllysine; <b>Fumarate</b> ; [Dihydrolipoyllysine-residue acetyltransferase] S-acetyl-dihydrolipoyllysine; Phosphoenolpyruvate                   |             |              |               |

**Supplementary Table S5.** Pathways with the highest significance according to the MetaboAnalyst analysis against the SMPDB library.

| Pathway                       | Total                                                                                                                                                                                                                                                                                                                                                                                                                                                                                                                                                                                                                                                                                                                                                                                                                                                                                                                                                                                                                                                                                                                                                                                                                                                                                                                             | Hits | Raw p     | Impact  |
|-------------------------------|-----------------------------------------------------------------------------------------------------------------------------------------------------------------------------------------------------------------------------------------------------------------------------------------------------------------------------------------------------------------------------------------------------------------------------------------------------------------------------------------------------------------------------------------------------------------------------------------------------------------------------------------------------------------------------------------------------------------------------------------------------------------------------------------------------------------------------------------------------------------------------------------------------------------------------------------------------------------------------------------------------------------------------------------------------------------------------------------------------------------------------------------------------------------------------------------------------------------------------------------------------------------------------------------------------------------------------------|------|-----------|---------|
| Pentose Phosphate Pathway     | 27                                                                                                                                                                                                                                                                                                                                                                                                                                                                                                                                                                                                                                                                                                                                                                                                                                                                                                                                                                                                                                                                                                                                                                                                                                                                                                                                | 8    | 0.0058294 | 0.64907 |
|                               | List                                                                                                                                                                                                                                                                                                                                                                                                                                                                                                                                                                                                                                                                                                                                                                                                                                                                                                                                                                                                                                                                                                                                                                                                                                                                                                                              |      |           |         |
|                               | Beta-D-Glucose 6-phosphate; NADP; Gluconolactone; NADPH; Water; <b>6-Phosphogluconic acid</b> ; <b>D-Ribulose 5-phosphate</b> ; Carbon dioxide; <b>D-Ribose 5-phosphate</b> ; <b>D-Ribose</b> ; Adenosine triphosphate; ADP; <b>Ribose 1-phosphate</b> ; Phosphoribosyl pyrophosphate; Adenosine 2'-phosphate; Xylulose 5-phosphate; D-Glyceraldehyde 3-phosphate; D-Sedoheptulose 7-phosphate; D-Erythrose 4-phosphate; <b>Fructose 6-phosphate</b> ; <b>Fructose 1,6-bisphosphate</b> ; Dihydroxyacetone phosphate; Hydrogen phosphate; Acetaldehyde; Deoxyribose 5-phosphate; Deoxyribose 1-phosphate; <b>Glucose 6-phosphate</b>                                                                                                                                                                                                                                                                                                                                                                                                                                                                                                                                                                                                                                                                                              |      |           |         |
| Warburg Effect                | Total                                                                                                                                                                                                                                                                                                                                                                                                                                                                                                                                                                                                                                                                                                                                                                                                                                                                                                                                                                                                                                                                                                                                                                                                                                                                                                                             | Hits | Raw p     | Impact  |
|                               | 48                                                                                                                                                                                                                                                                                                                                                                                                                                                                                                                                                                                                                                                                                                                                                                                                                                                                                                                                                                                                                                                                                                                                                                                                                                                                                                                                | 11   | 0.012627  | 0.29145 |
|                               | List                                                                                                                                                                                                                                                                                                                                                                                                                                                                                                                                                                                                                                                                                                                                                                                                                                                                                                                                                                                                                                                                                                                                                                                                                                                                                                                              |      |           |         |
|                               | Alpha-D-Glucose; Adenosine triphosphate; <b>Glucose 6-phosphate</b> ; ADP; <b>Fructose 6-phosphate</b> ; <b>Fructose 1,6-bisphosphate</b> ; Dihydroxyacetone phosphate; D-Glyceraldehyde 3-phosphate; NADH; Hydrogen phosphate; Glyceric acid 1,3-bisphosphate; <b>3-Phosphoglyceric acid</b> ; 2-Phospho-D-glyceric acid; Phosphoenolpyruvic acid; Water; Pyruvic acid; Hydrogen carbonate; Oxalacetic acid; Coenzyme A; Acetyl-CoA; Carbon dioxide; <b>Citric acid</b> ; Ammonium lactate; Hydrogen Ion; (1R,2R)-Isocitric acid; Oxoglutaric acid; Succinyl-CoA; Guanosine diphosphate; <b>Succinic acid</b> ; Guanosine triphosphate; Ubisemiquinone; FAD; <b>Fumaric acid</b> ; QH(2); FADH; <b>L-Malic acid</b> ; D-Glutamic acid; Ammonia; D-Glutamine; D-Erythrose 4-phosphate; D-Sedoheptulose 7-phosphate; <b>D-Ribose 5-phosphate</b> ; <b>D-Ribulose 5-phosphate</b> ; 6-Phosphonoglucono-D-lactone; <b>6-Phosphogluconic acid</b> ; Hydrogen; Beta-D-Glucose 6-phosphate; NADP; NADPH                                                                                                                                                                                                                                                                                                                                 |      |           |         |
| Purine Metabolism             | Total                                                                                                                                                                                                                                                                                                                                                                                                                                                                                                                                                                                                                                                                                                                                                                                                                                                                                                                                                                                                                                                                                                                                                                                                                                                                                                                             | Hits | Raw p     | Impact  |
|                               | 13                                                                                                                                                                                                                                                                                                                                                                                                                                                                                                                                                                                                                                                                                                                                                                                                                                                                                                                                                                                                                                                                                                                                                                                                                                                                                                                                | 63   | 0.01406   | 0.22087 |
|                               | List                                                                                                                                                                                                                                                                                                                                                                                                                                                                                                                                                                                                                                                                                                                                                                                                                                                                                                                                                                                                                                                                                                                                                                                                                                                                                                                              |      |           |         |
|                               | Diguanosine tetraphosphate; Water; Guanosine triphosphate; <b>Guanosine monophosphate</b> ; Adenosine triphosphate; Guanosine diphosphate; ADP; Hydrogen phosphate; dGDP; dGTP; 2'-Deoxyguanosine 5'-monophosphate; Deoxyguanosine; <b>Pyrophosphate</b> ; Guanine; Phosphoribosyl pyrophosphate; Guanosine; <b>Ribose 1-phosphate</b> ; Deoxyribose 1-phosphate; <b>Xanthine</b> ; Ammonia; Adenosine diphosphate ribose; Adenosine 2'-phosphate; <b>D-Ribose 5-phosphate</b> ; 5-Phosphoribosylamine; D-Glutamic acid; D-Glutamine; <b>Glycine</b> ; Glycineamideribotide; 10-Formyltetrahydrofolate; Tetrahydrofolic acid; 5'-Phosphoribosyl-N-formylglycinamide; Phosphoribosylformylglycineamidine; 5-amino-1-(5-phospho-D-ribosyl)imidazole-4-carboxylate; 5-Aminoimidazole ribonucleotide; Carbon dioxide; <b>L-Aspartic acid</b> ; SAICAR; <b>Fumaric acid</b> ; 5-Aminoimidazole-4-carboxamide; Phosphoribosyl formamidocarboxamide; <b>Inosinic acid</b> ; Xanthylic acid; NADH; NADP; NADPH; Xanthosine; <b>Inosine</b> ; <b>Hypoxanthine</b> ; Oxygen; Hydrogen peroxide; Uric acid; Deoxyinosine; 6-Succinoaminopurine; <b>Adenosine</b> ; <b>Adenine</b> ; Deoxyadenosine; Cyclic AMP; Deoxyadenosine monophosphate; dADP; Deoxyadenosine triphosphate; Guanosine 2',3'-cyclic phosphate; IDP; Inosine triphosphate |      |           |         |
| Galactose Metabolism          | Total                                                                                                                                                                                                                                                                                                                                                                                                                                                                                                                                                                                                                                                                                                                                                                                                                                                                                                                                                                                                                                                                                                                                                                                                                                                                                                                             | Hits | Raw p     | Impact  |
|                               | 8                                                                                                                                                                                                                                                                                                                                                                                                                                                                                                                                                                                                                                                                                                                                                                                                                                                                                                                                                                                                                                                                                                                                                                                                                                                                                                                                 | 31   | 0.014242  | 0.17516 |
|                               | List                                                                                                                                                                                                                                                                                                                                                                                                                                                                                                                                                                                                                                                                                                                                                                                                                                                                                                                                                                                                                                                                                                                                                                                                                                                                                                                              |      |           |         |
|                               | L-Galactose; Sorbitol; Melibiitol; <b>D-Mannose</b> ; Epimelibiose; <b>myo-Inositol</b> ; Galactinol; <b>Glycerol</b> ; Galactosylglycerol; Stachyose; Raffinose; Sucrose; <b>Alpha-Lactose</b> ; <b>Melibiose</b> ; Water; D-Fructose; Galactan; NADH; L-Iditol; Adenosine triphosphate; Galactose 1-phosphate; ADP; Uridine diphosphategalactose; Alpha-D-Glucose; Uridine 5'-diphosphate; <b>Glucose 1-phosphate</b> ; Uridine diphosphate glucose; <b>Pyrophosphate</b> ; Uridine triphosphate; <b>Glucose 6-phosphate</b> ; Hydrogen phosphate                                                                                                                                                                                                                                                                                                                                                                                                                                                                                                                                                                                                                                                                                                                                                                               |      |           |         |
| Glycine and Serine Metabolism | Total                                                                                                                                                                                                                                                                                                                                                                                                                                                                                                                                                                                                                                                                                                                                                                                                                                                                                                                                                                                                                                                                                                                                                                                                                                                                                                                             | Hits | Raw p     | Impact  |
|                               | 11                                                                                                                                                                                                                                                                                                                                                                                                                                                                                                                                                                                                                                                                                                                                                                                                                                                                                                                                                                                                                                                                                                                                                                                                                                                                                                                                | 50   | 0.01472   | 0.11953 |
|                               | List                                                                                                                                                                                                                                                                                                                                                                                                                                                                                                                                                                                                                                                                                                                                                                                                                                                                                                                                                                                                                                                                                                                                                                                                                                                                                                                              |      |           |         |

|                          |                                                                                                                                                                                                                                                                                                                                                                                                                                                                                                                                                                                                                                                                                                                                                                                                                                                                                                                                                                                                                                                                                                                                                                                                                                                                                                                                                |             |              |               |
|--------------------------|------------------------------------------------------------------------------------------------------------------------------------------------------------------------------------------------------------------------------------------------------------------------------------------------------------------------------------------------------------------------------------------------------------------------------------------------------------------------------------------------------------------------------------------------------------------------------------------------------------------------------------------------------------------------------------------------------------------------------------------------------------------------------------------------------------------------------------------------------------------------------------------------------------------------------------------------------------------------------------------------------------------------------------------------------------------------------------------------------------------------------------------------------------------------------------------------------------------------------------------------------------------------------------------------------------------------------------------------|-------------|--------------|---------------|
|                          | Aminoacetone; Oxygen; Water; Ammonia; Hydrogen peroxide; Pyruvaldehyde; NADH; Pyruvic acid; L-2-Amino-3-oxobutanoic acid; Carbon dioxide; 2-amino-3-ketobutyrate coenzyme A ligase, mitochondrial; <b>Glycine</b> ; Dimethylglycine dehydrogenase, mitochondrial; Formaldehyde; 8-[(Aminomethyl)sulfanyl]-6-sulfanyloctanoic acid; Aminomethyltransferase, mitochondrial; Dihydrolipoate; 5,10-Methylene-THF; Serine hydroxymethyltransferase, mitochondrial; <b>L-Serine</b> ; Dihydrolipoyl dehydrogenase, mitochondrial; <b>Serine--pyruvate aminotransferase</b> ; D-Alanine; Serine--pyruvate aminotransferase; <b>Glycine amidinotransferase, mitochondrial</b> ; Guanidoacetic acid; <b>Guanidinoacetate N-methyltransferase</b> ; S-Adenosylmethionine; 5-aminolevulinate synthase, nonspecific, mitochondrial; 5-Aminolevulinic acid; Betaine--homocysteine S-methyltransferase 1; Homocysteine; Racemethionine; <b>Glycine N-methyltransferase</b> ; <b>Glycerate kinase</b> ; Adenosine triphosphate; <b>3-Phosphoglyceric acid</b> ; ADP; Phosphohydroxypyruvic acid; Phosphoserine aminotransferase; DL-O-Phosphoserine; Oxoglutaric acid; <b>Phosphoserine phosphatase</b> ; Hydrogen phosphate; Adenosine 2'-phosphate; <b>Pyrophosphate</b> ; L-Seryl-tRNA(Ser); Glycyl-tRNA(Gly); <b>L-Cystathionine</b> ; 2-Ketobutyric acid |             |              |               |
| Homocysteine Degradation | <b>Total</b>                                                                                                                                                                                                                                                                                                                                                                                                                                                                                                                                                                                                                                                                                                                                                                                                                                                                                                                                                                                                                                                                                                                                                                                                                                                                                                                                   | <b>Hits</b> | <b>Raw p</b> | <b>Impact</b> |
|                          | 3                                                                                                                                                                                                                                                                                                                                                                                                                                                                                                                                                                                                                                                                                                                                                                                                                                                                                                                                                                                                                                                                                                                                                                                                                                                                                                                                              | 7           | 0.031817     | 0.5           |
|                          | <b>List</b>                                                                                                                                                                                                                                                                                                                                                                                                                                                                                                                                                                                                                                                                                                                                                                                                                                                                                                                                                                                                                                                                                                                                                                                                                                                                                                                                    |             |              |               |
|                          | Homocysteine; <b>L-Serine</b> ; Water; <b>L-Cystathionine</b> ; <b>L-Cysteine</b> ; 2-Ketobutyric acid; Ammonia                                                                                                                                                                                                                                                                                                                                                                                                                                                                                                                                                                                                                                                                                                                                                                                                                                                                                                                                                                                                                                                                                                                                                                                                                                |             |              |               |
